# Supplementary material for: Efficient monochromatic red-light-emitting PLEDs based on a series of nonconjugated Eu-polymers containing a neutral terpyridyl ligand
Source: Royal Society of Chemistry journal article supplement (doi:10.1039/c3tc30681j), 2013-01-01
Supplement: c3tc30681j.pdf [file c3tc30681j.pdf]

## Supporting Information

### Efficient monochromatic red-light-emitting PLEDs based on a series of nonconjugated Eu-polymers containing a neutral terpyridyl ligand

*Chaolong Yang,<sup>†,‡,§</sup> Jing Xu,<sup>†,§</sup> Yunfei Zhang,<sup>†,§</sup> Yinwen Li,<sup>†,§</sup> Jian Zheng,<sup>†,§</sup> Liyan Liang,<sup>†</sup> Mangeng Lu<sup>\*,†</sup>*

<sup>a</sup>Key Laboratory of Polymer Materials for Electronics, Guangzhou Institute of Chemistry, Chinese Academy of Sciences, Guangzhou 510650, PR China

<sup>b</sup>School of Materials Science and Engineering, Chongqing University of Technology, Chongqing 400054, PR China

<sup>c</sup>University of Chinese Academy of Sciences, Beijing 100039, PR China

Corresponding author. Tel/ Fax: +86 20 85232978 Email address: mglu@gic.ac.cn

#### **Table of Contents:**

- 1. The NMR and ESI-MS data of compounds.**
- 2. Additional Fig.S (Fig. S1-S8).**
- 3. Table S1 and S2.**

### 1. The NMR and ESI-MS data of compounds.

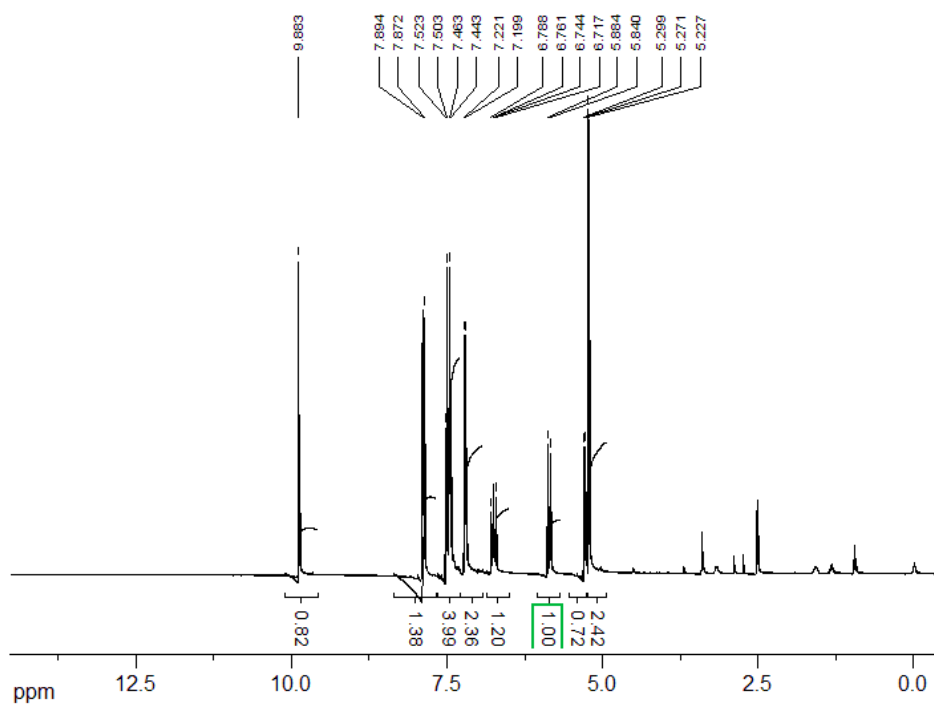

<sup>1</sup>H NMR of 4-(4-vinylbenzyloxy)benzaldehyde

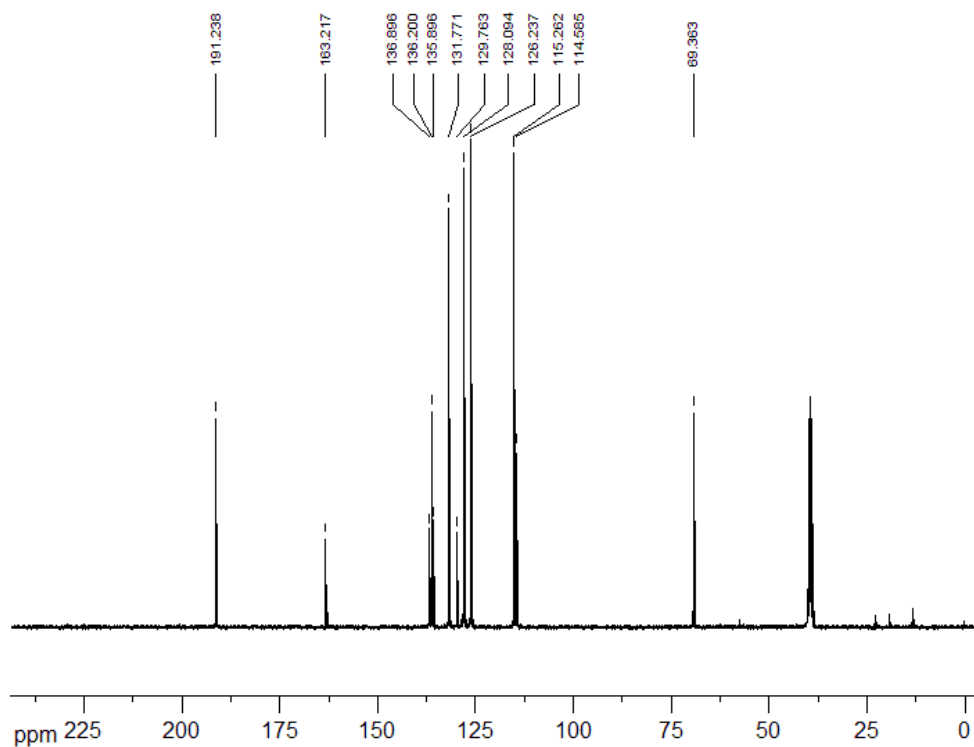

<sup>13</sup>C NMR of 4-(4-vinylbenzyloxy)benzaldehyde

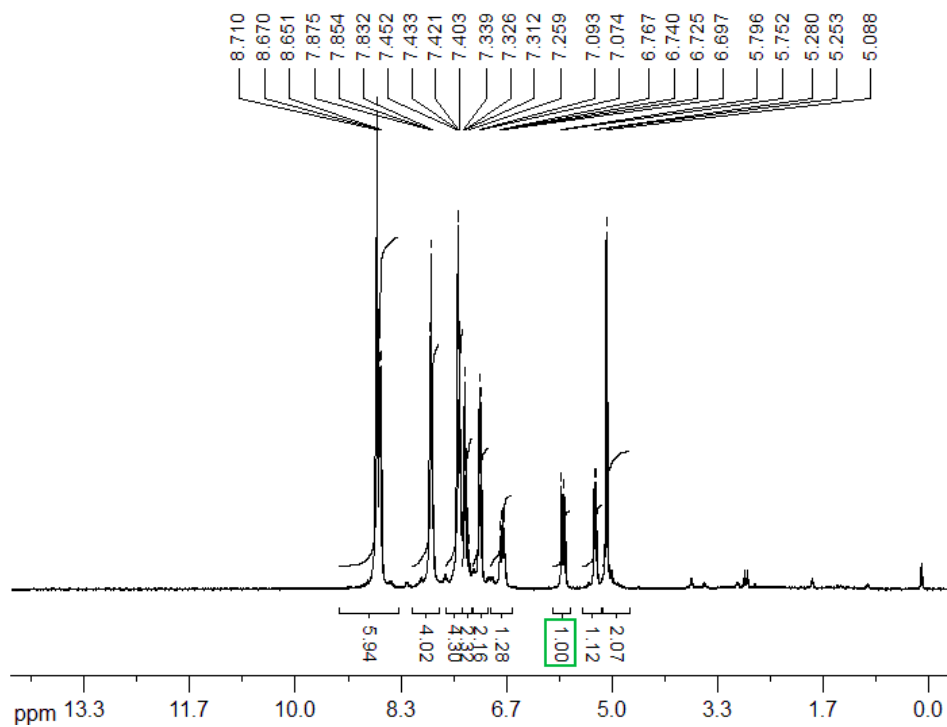

$^1\text{H}$  NMR of 4'-(4-((4-vinylbenzyl)oxy)phenyl)-2,2':6',2''-terpyridine

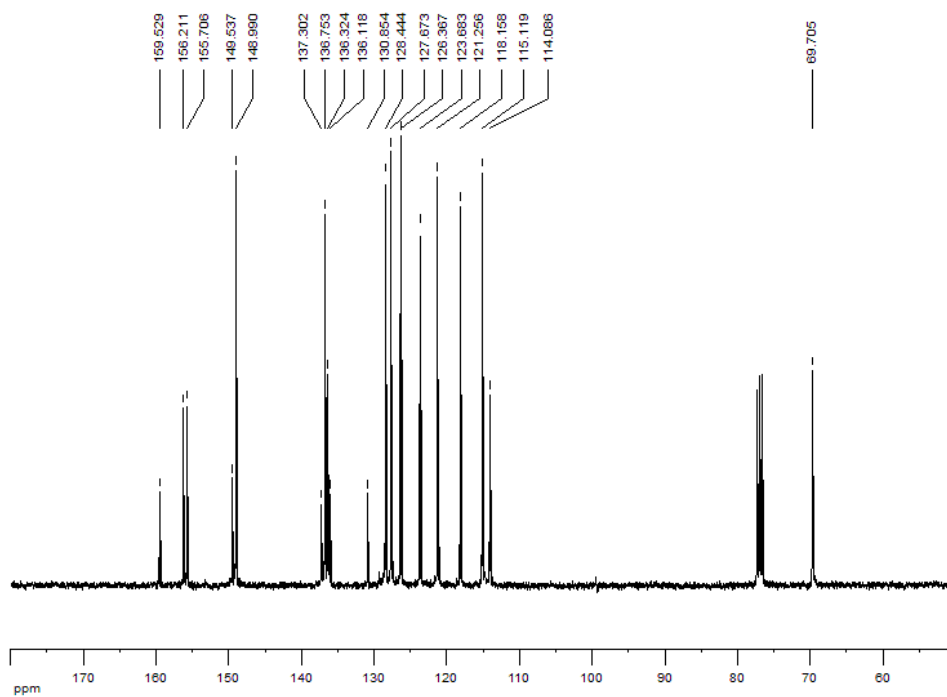

$^{13}\text{C}$  NMR of 4'-(4-((4-vinylbenzyl)oxy)phenyl)-2,2':6',2''-terpyridine

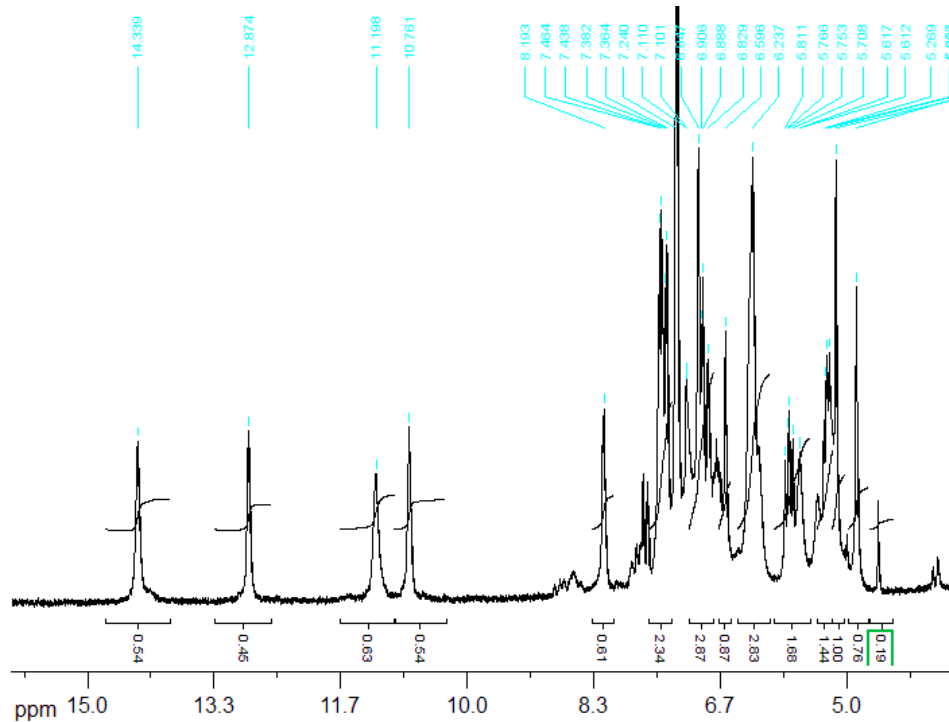

<sup>1</sup>H NMR of Eu(TTA)<sub>3</sub>VTPY

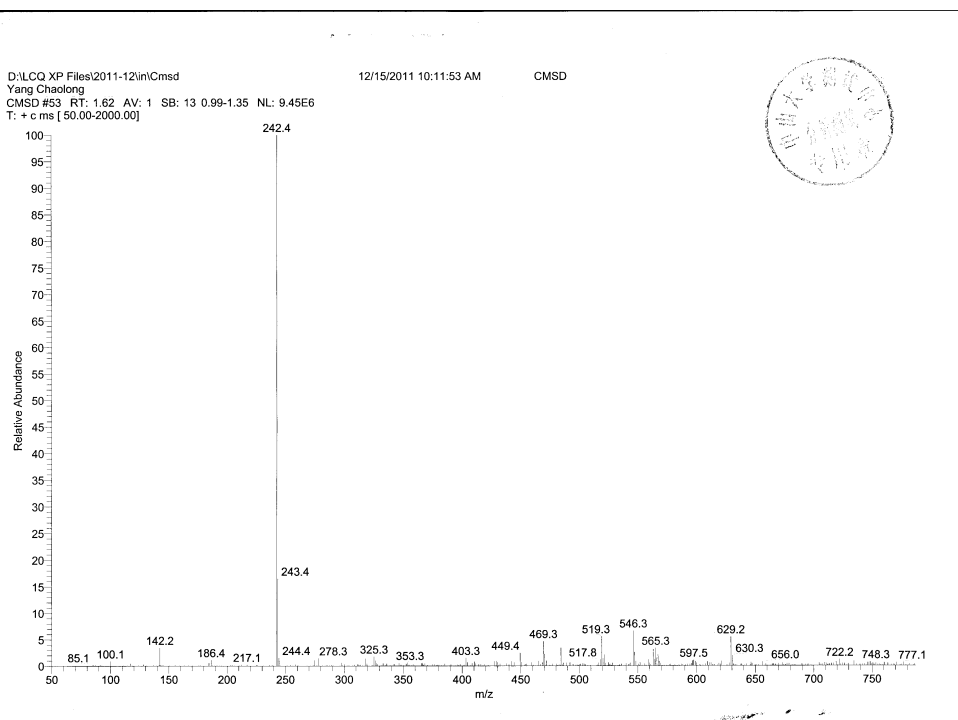

ESI-MS of 4-(4-vinylbenzyloxy)benzaldehyde

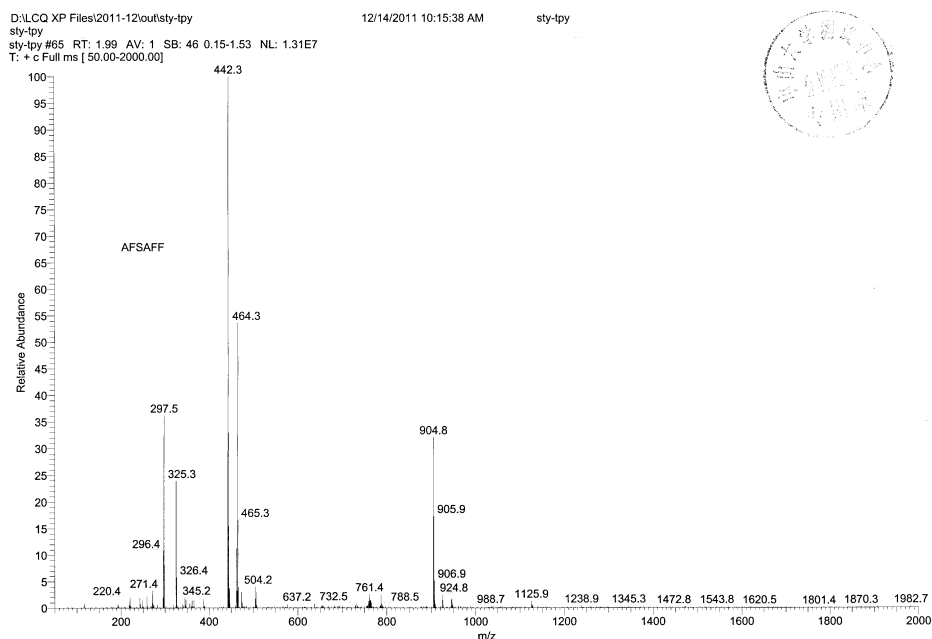

ESI-MS of 4'-(4-((4-vinylbenzyl)oxy)phenyl)-2,2':6',2''-terpyridine

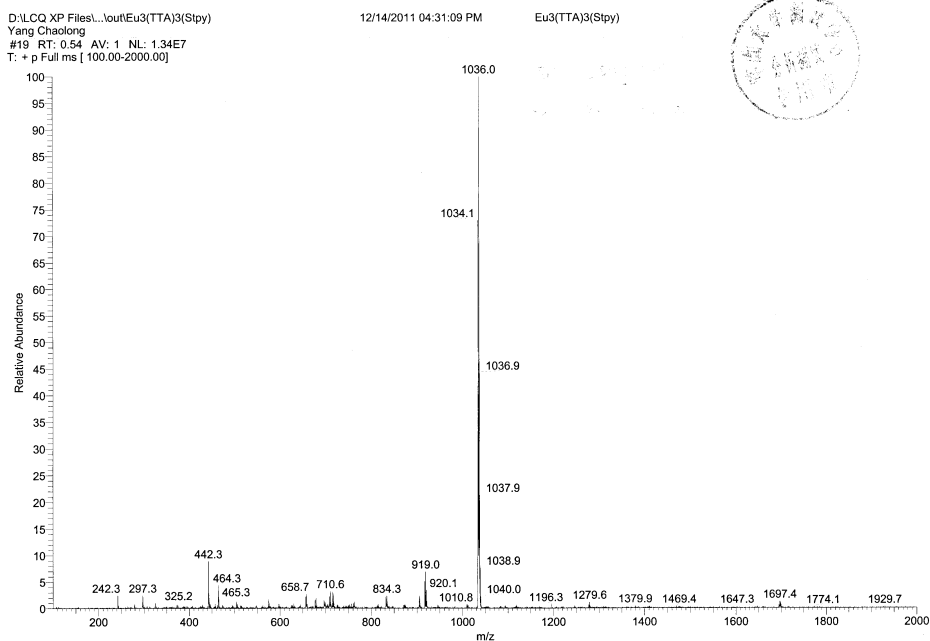

ESI-MS of Eu(TTA)<sub>2</sub>VTPY

## 2. Additional Fig.S (Fig. S1-S8).

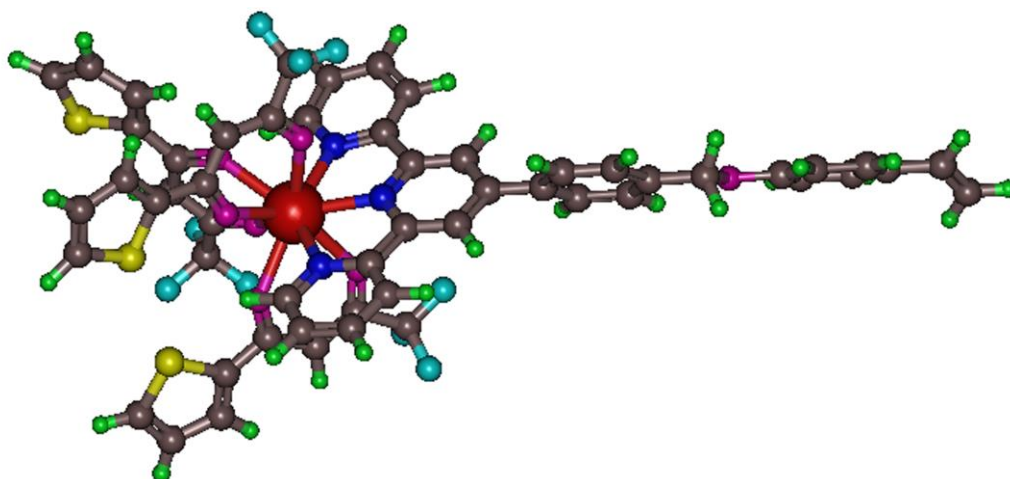

**Figure S1** The ground state geometry of the monomer EuVTPY calculated using Sparkl/PM6 model. (Light green, black, blue, pink, blue-green, yellow, and red balls correspond to hydrogen, carbon, nitrogen, oxygen, fluorine, sulfur, and europium atoms, respectively.)

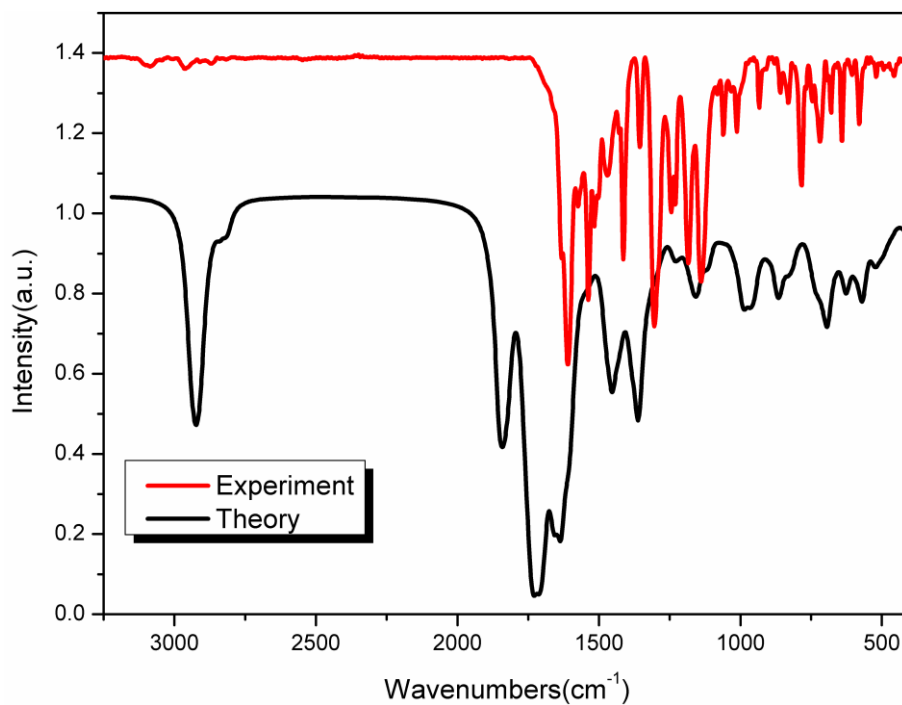

**Figure S2** The experimental and simulated FTIR spectra of EuVTPY.

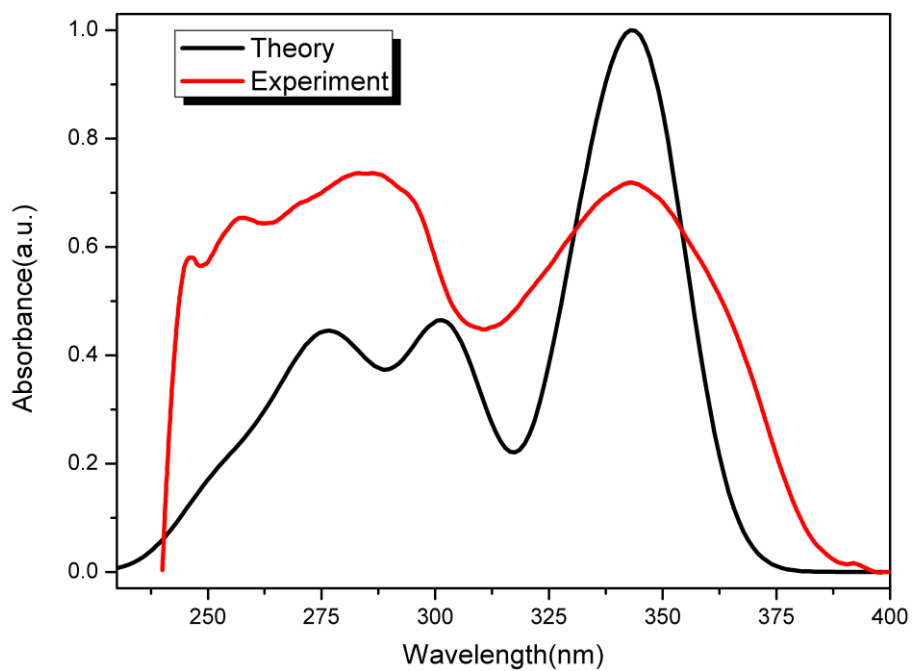

**Figure S3** The experimental and simulated UV-vis absorption of EuVTPY.

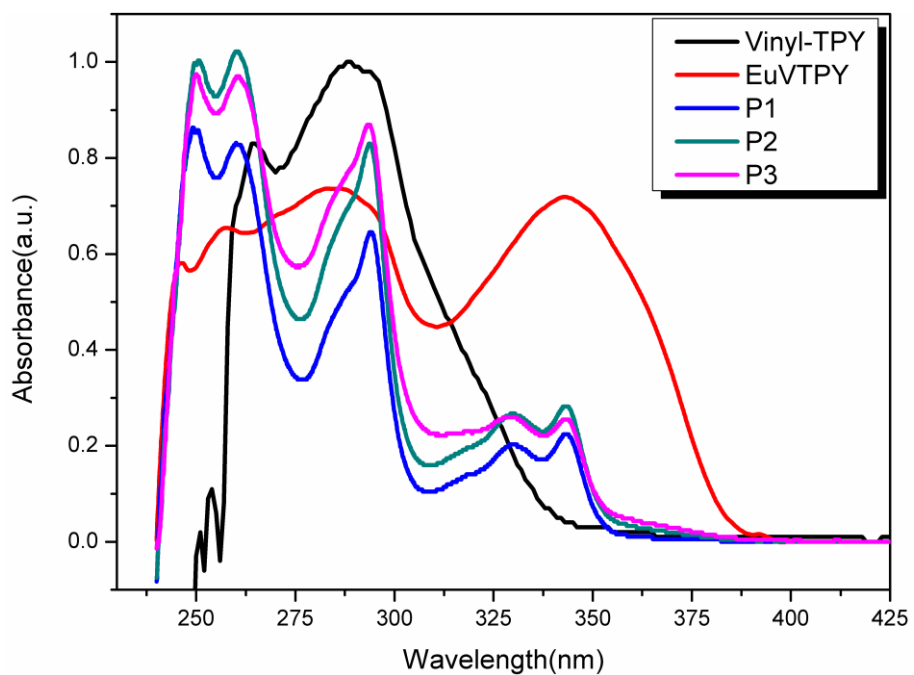

**Figure S4** UV-vis absorption of ligands and Eu-polymers ( $1 \times 10^{-5}$  mol/L)

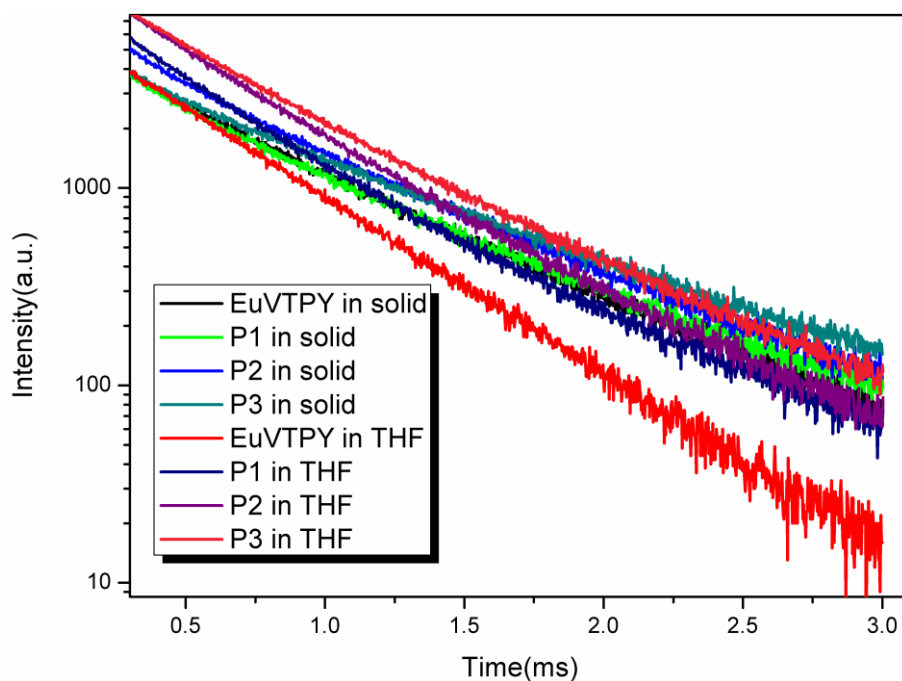

**Figure S5** The decay curves of EuVTPY and Eu-polymers in solid state and in THF solutions ( $\lambda_{em} = 616$  nm,  $\lambda_{ex} = 360$  nm).

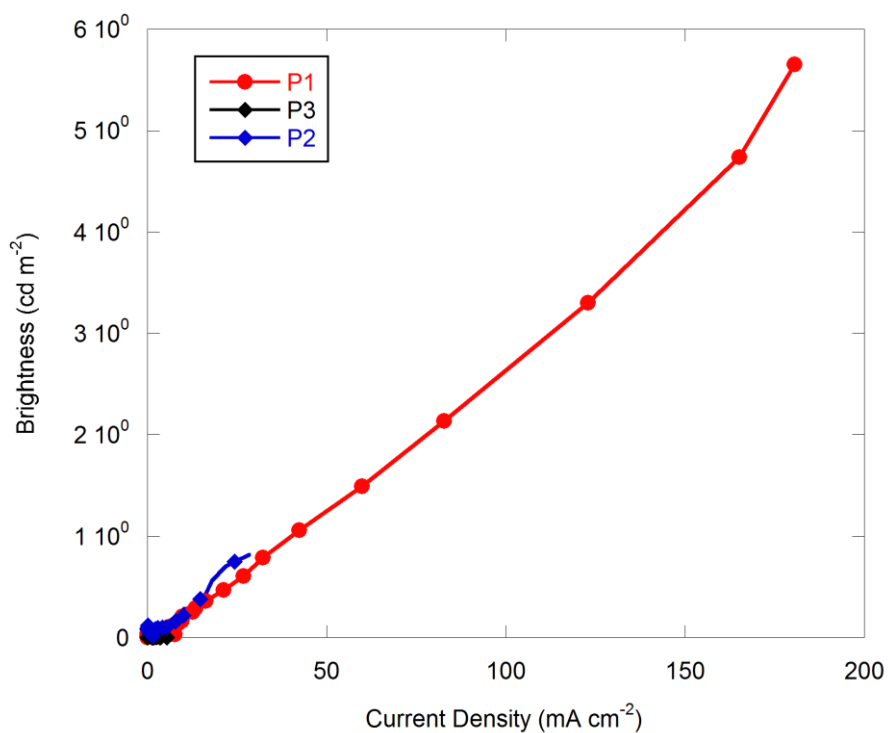

**Figure S6** Brightness-Current Density (*B-J*) curves of device A-C.



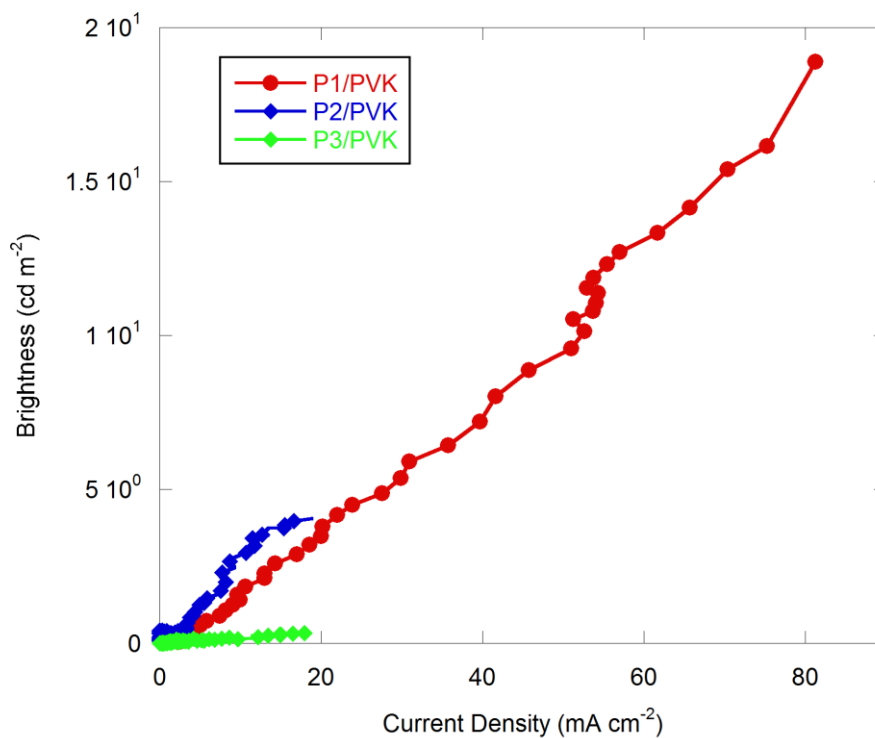

**Figure S7** Brightness-Current Density (*B-J*) curves of device D-F.

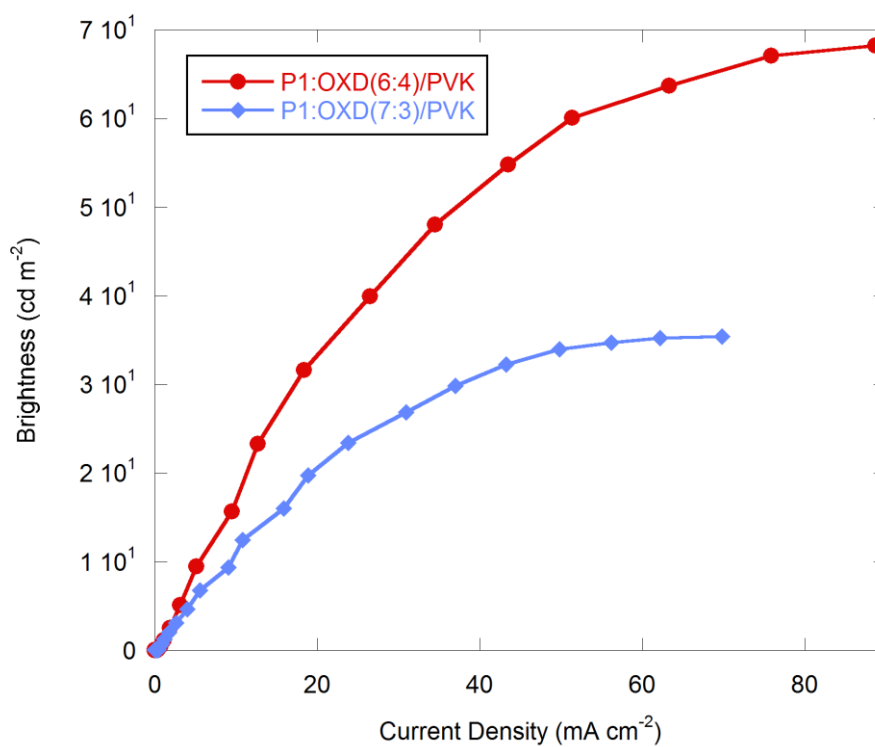

**Figure S8** Brightness-Current Density (*B-J*) curves of device G-H.

### 3. Table S1 and S2.

**Table S1** The feed and observed ratio in polymerization experiments of monomers

| Copolymer | Feed<br>ratio(EuVTPY:NVK) | Observed ratio | Mn    | PDI  |
|-----------|---------------------------|----------------|-------|------|
| P1        | 1:97                      | 1:100          | 10053 | 1.83 |
| P2        | 1:48                      | 1:50           | 8228  | 1.87 |
| P3        | 1:25                      | 1:30           | 6226  | 1.67 |

**Table S2** Spherical atomic coordinates calculated *via* Sparkle/PM6 coordination polyhedron of the complex EuVTPY.

| Atom             | $R$ (Å) | $\theta$ (degree) | $\varphi$ (degree) |
|------------------|---------|-------------------|--------------------|
| Eu <sup>3+</sup> | 0.000   | 0.000             | 0.000              |
| Eu—N(Tpy)        | 2.551   | 44.342            | 12.355             |
| Eu—N(Tpy)        | 2.555   | 70.631            | 299.721            |
| Eu—N(Tpy)        | 2.548   | 71.294            | 84.186             |
| Eu—O(TTA)        | 2.411   | 144.309           | 305.911            |
| Eu—O(TTA)        | 2.403   | 88.364            | 338.014            |
| Eu—O(TTA)        | 2.398   | 90.805            | 46.558             |
| Eu—O(TTA)        | 2.414   | 26.952            | 43.459             |
| Eu—O(TTA)        | 2.389   | 140.020           | 307.423            |
| Eu—O(TTA)        | 2.403   | 106.844           | 16.702             |
